# Supplementary material for: Putrescine mitigates intestinal atrophy through suppressing inflammatory response in weanling piglets
Source: PubMed Central journal article supplement (PMC6734277; doi:10.1186/s40104-019-0379-9), 2019-09-10

Supplementary Figure 1

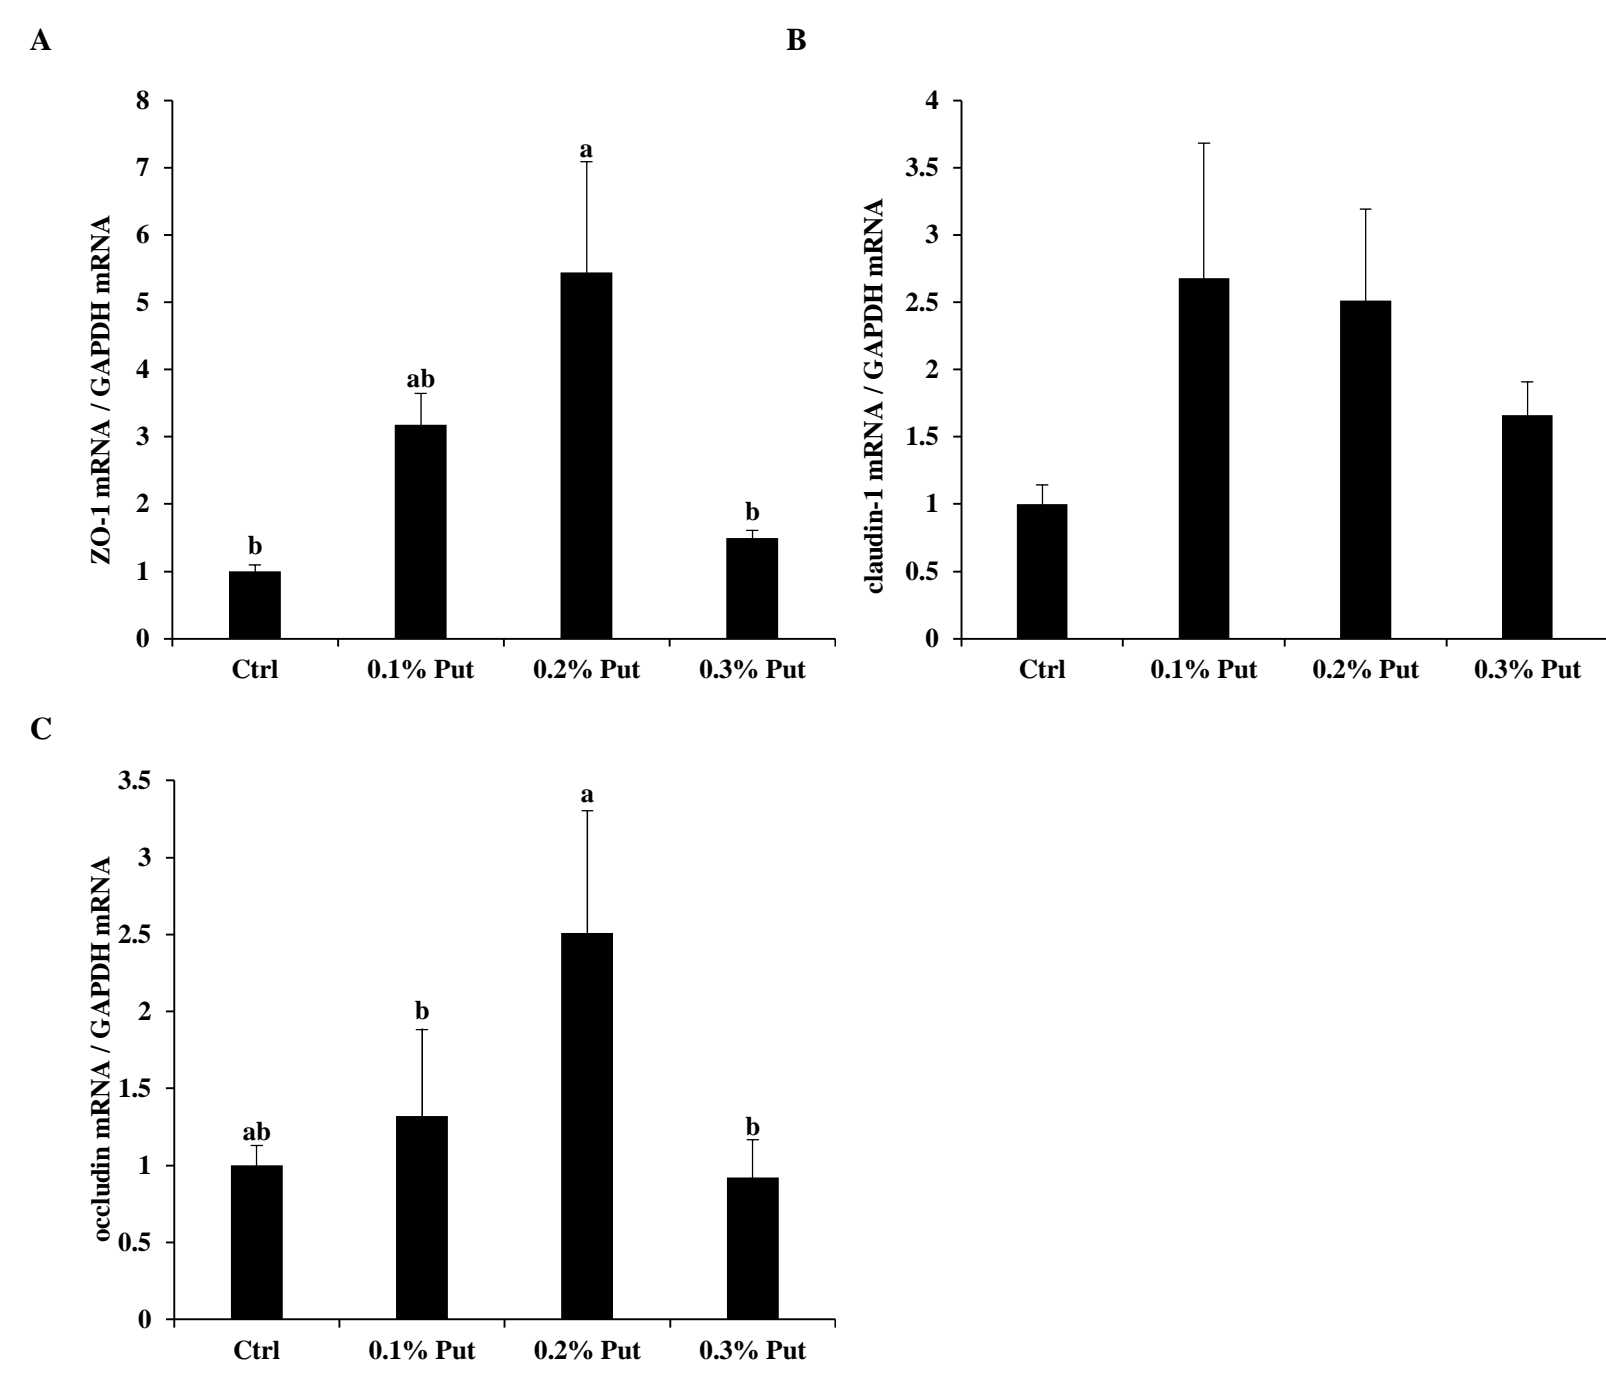

Supplement: 40104_2019_379_MOESM4_ESM.pdf [file 40104_2019_379_MOESM4_ESM.pdf]
